# Supplementary material for: Real-Time Temperature Sensing Using a Ratiometric Dual Fluorescent Protein Biosensor
Source: MDPI journal article supplement (doi:10.3390/bios13030338), 2023-03-03
Supplement: s1 [file s1]

# Real-time Temperature Sensing Using a Ratiometric Dual Fluorescent Protein Biosensor

Alanna E. Sorenson and Patrick M. Schaeffer \*

Molecular and Cell Biology, College of Public Health, Medical and Veterinary Sciences, James Cook University, Douglas QLD 4811, Australia.

\* Correspondence: Patrick.schaeffer@jcu.edu.au; Tel: +61 (0) 7 4781 4448

**Table S1.** Comparison of dual fluorescent thermosensors.

| Material                                                       | Ratiometric Type | Temperature Range (°C) | Sensitivity (% °C <sup>-1</sup> ) | Ref.      |
|----------------------------------------------------------------|------------------|------------------------|-----------------------------------|-----------|
| Polymer dot / rhodamine B                                      | - ↓              | 10 – 70                | 0.23                              | [1]       |
| Organoplatinum metallacycles                                   | ↓↓               | −20 – 60               | 0.76                              | [2]       |
| Multi-emission phosphors (Ce <sup>3+</sup> /Mn <sup>2+</sup> ) | ↑↓               | 27 – 302               | 0.8                               | [3]       |
| Europium MOF / perylene dye                                    | - ↓              | 20 – 80                | 1.28                              | [4]       |
| Amphiphilic alkynylpyrene derivatives                          | ↑↓               | 0 – 80                 | < 1.0                             | [5]       |
| B-gTEMP (mNeonGreen/tdTomato)                                  | ↓↓               | 15 – 50                | 1.7                               | [6]       |
| DFPTB ln(ratio)                                                | ↑↓               | 4 – 70                 | 2.2 – 3.0                         | This work |
| gTEMP (Sirius/mT-Sapphire)                                     | ↓↓               | 5 – 50                 | 2.6                               | [7]       |
| Dual-emitting dihydrophenazines                                | ↑↓               | 50 – 135               | 3.4                               | [8]       |
| DFPTB (ratio)                                                  | ↑↓               | 25 – 42                | 4.8 – 6.7                         | This work |
| Emissive platinum (II) cages                                   | ↑↓               | −4 – 60                | 6.7                               | [9]       |
| Dihydrophenazine derivatives                                   | ↑↓               | 18.4 – 37.7            | 140.1                             | [10]      |

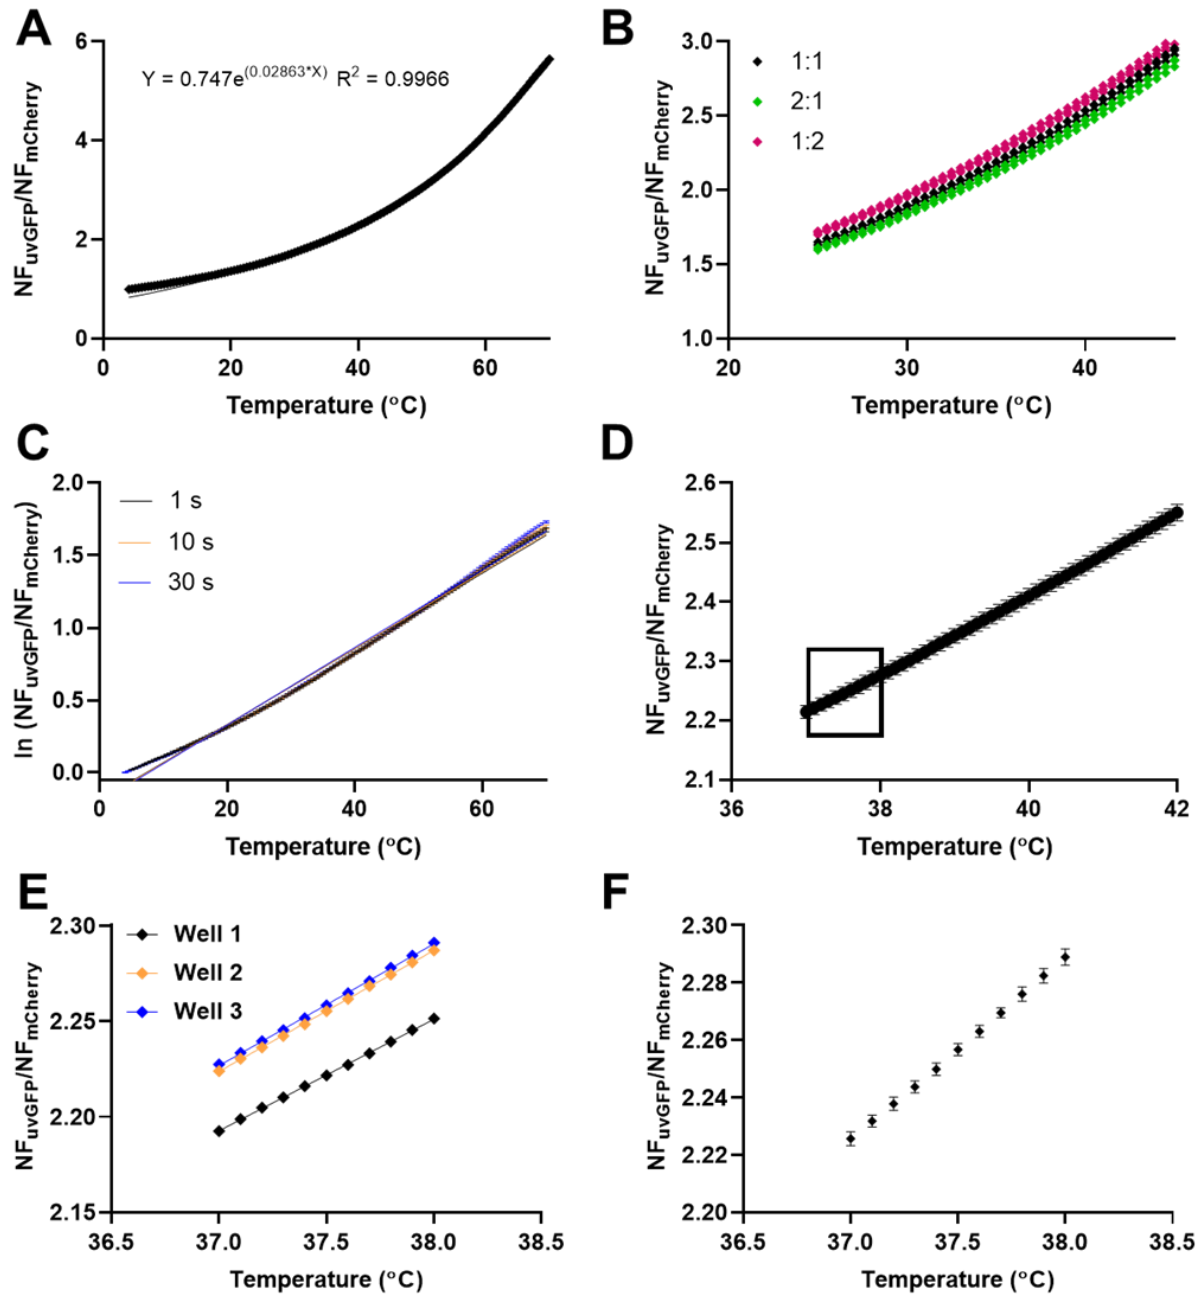

**Figure S1.** (A) DFPTB ratio of normalized fluorescence fitted to an exponential (Malthusian) growth curve. (B) Changes in fluorescent protein ratio do not affect the DFPTB. 1:1 = 1  $\mu$ M each, 2:1 = 2  $\mu$ M uvGFP and 1  $\mu$ M mCherry, 1:2 = 1  $\mu$ M uvGFP and 2  $\mu$ M uvGFP. (C) Incubation times between 1-60 s do not affect the DFPTB. (D) Resolution in the physiological range (37–42 °C) at 0.1°C increments in continuous monitoring (melt curve). (E) Inset from (D) showing data for individual wells. (F) Inset from (D) with outlying well 1 data removed. Error bars indicate standard deviation. Data were analyzed using the Kruskal-Wallis test ( $P = 0.022$ ). Pairwise comparison of changes in temperature between 0.2 °C increments were analyzed using paired t-tests ( $P$  values ranged from 0.003–0.0483).

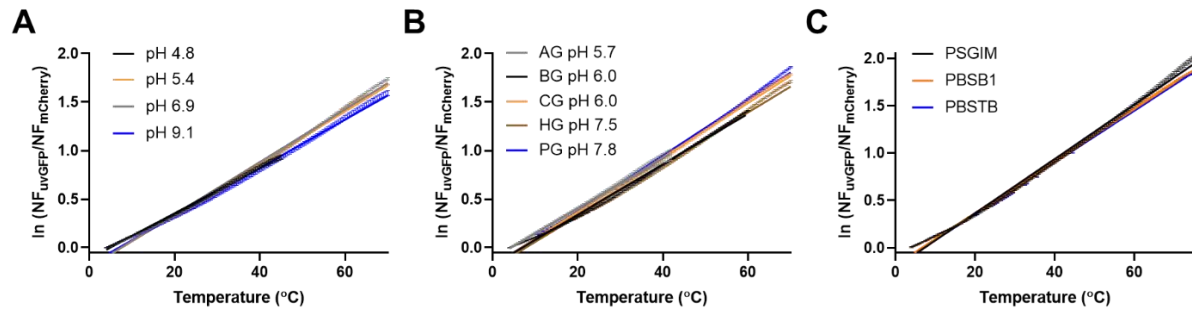

**Figure S2.** Performance of the DFPTB in buffers with varying composition and pH. **(A)** 50 mM phosphate buffer. **(B)** 50 mM buffers with 10% glycerol (G); A = ammonium sulphate, B = Bis-Tris, C = citrate, H = HEPES, P = phosphate. **(C)** Buffers with more complex composition; PSGIM = 50 mM phosphate, pH 7.8 with 10% glycerol, 300 mM NaCl, 20 mM imidazole, 2 mM  $\beta$ -mercaptoethanol, PBSB1 = phosphate buffered saline, pH 7.2 with 10% glycerol and 1% BSA, PBSTB = phosphate buffered saline, pH 7.2 with 0.005% Tween and 4% BSA. Error bars indicate standard deviation.

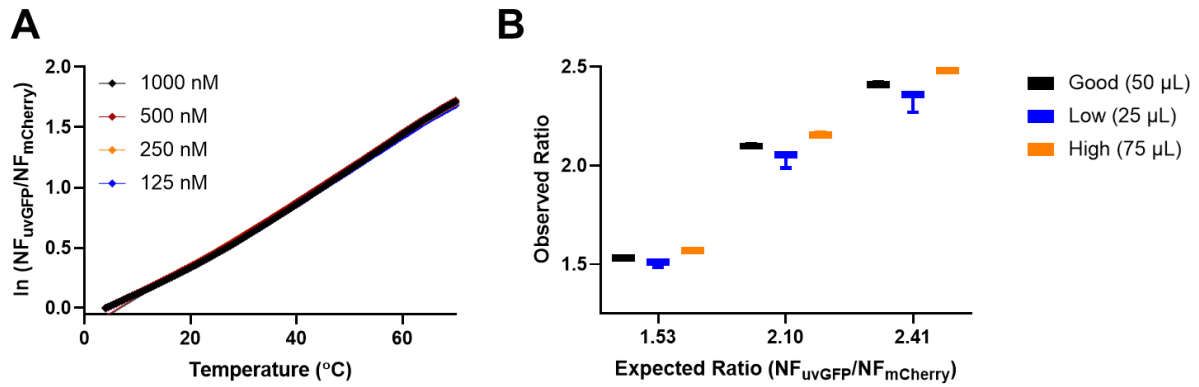

**Figure S3.** Effect on DFPTB dilution and detection of volume discrepancy. **(A)** Serial 2-fold dilutions of DFPTB in PBS, pH 7.2. **(B)** DFPTB aliquots of different volumes were performed in triplicate in PBS, pH 7.2. Agreement between expected ratio values for 50  $\mu$ L aliquots of DFPTB and observed ratio values obtained using a standard 4–70 °C DSF run with aliquots of DFPTB at 25, 50 and 75  $\mu$ L. Error bars indicate standard deviation.

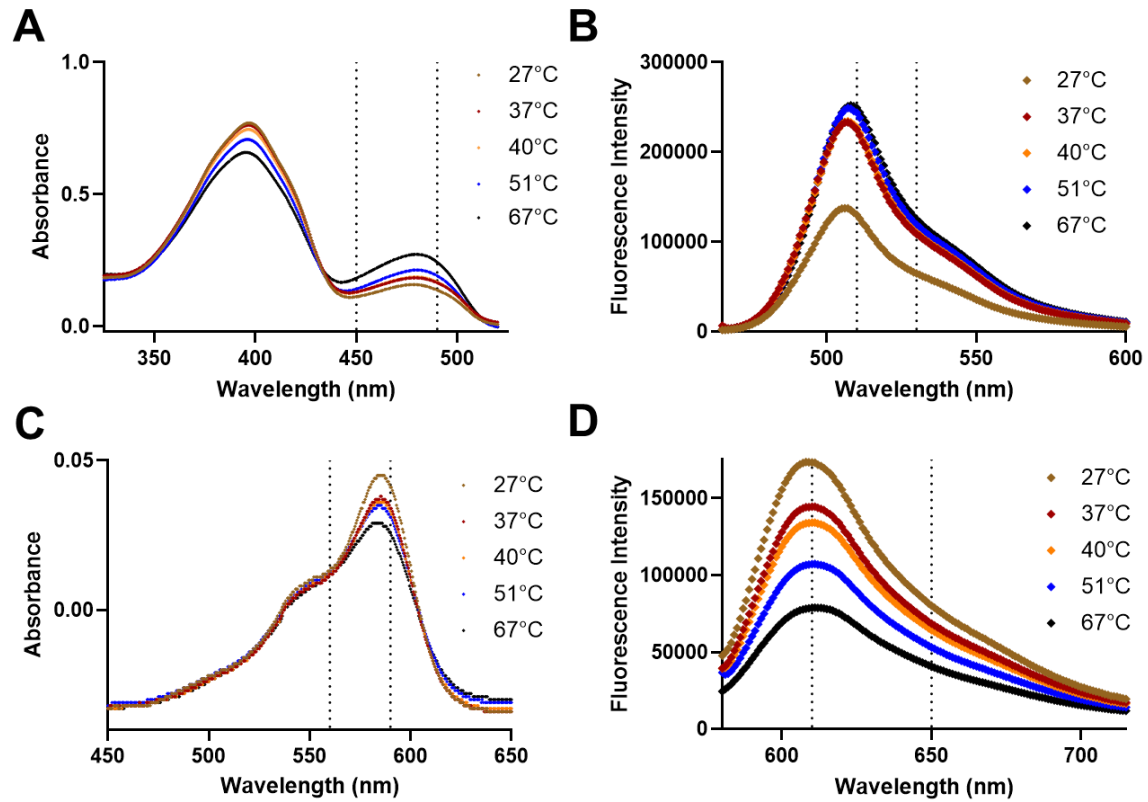

**Figure S4.** Absorbance and fluorescence spectra of uvGFP and mCherry at various temperatures. (A) uvGFP absorbance and (B) fluorescence spectra at 50  $\mu$ M in PBS, pH 7.2. (C) mCherry absorbance and (D) fluorescence spectra at 2.5  $\mu$ M in PBS, pH 7.2. Vertical dotted lines indicate excitation and emission wavelength ranges for Bio-Rad CFX96 FAM and Texas Red channels respectively.

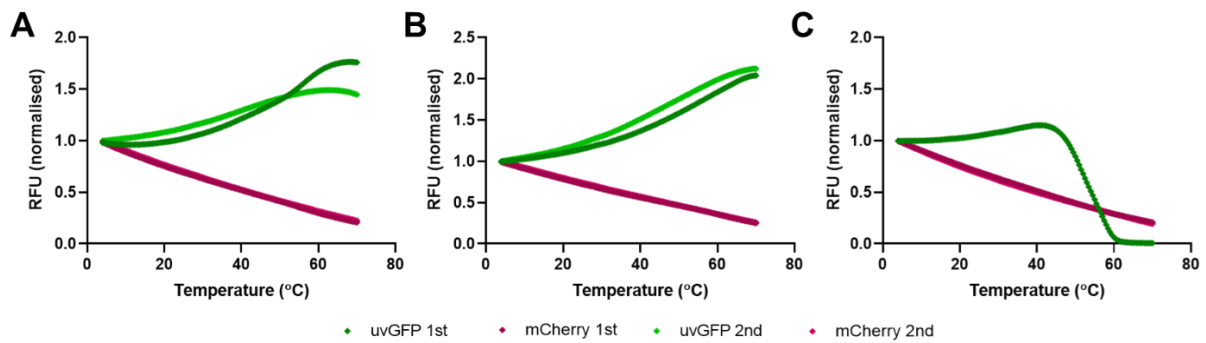

**Figure S5.** Performance of DFPTB in *E. coli* prior to and following cell lysis. (A) Lysis buffer (50 mM phosphate (pH 7.8), 300 mM NaCl, 10% glycerol, 20 mM imidazole, 2 mM  $\beta$ -mercaptoethanol). (B) High salt lysis buffer (lysis buffer with 1.4 M NaCl). (C) Low pH (50 mM phosphate, pH 4.8). uvGFP 1<sup>st</sup> and mCherry 1<sup>st</sup>: first melt curve run. uvGFP 2<sup>nd</sup> and mCherry 2<sup>nd</sup>: second melt curve run. No uvGFP data could be obtained in the second run at pH 4.8.

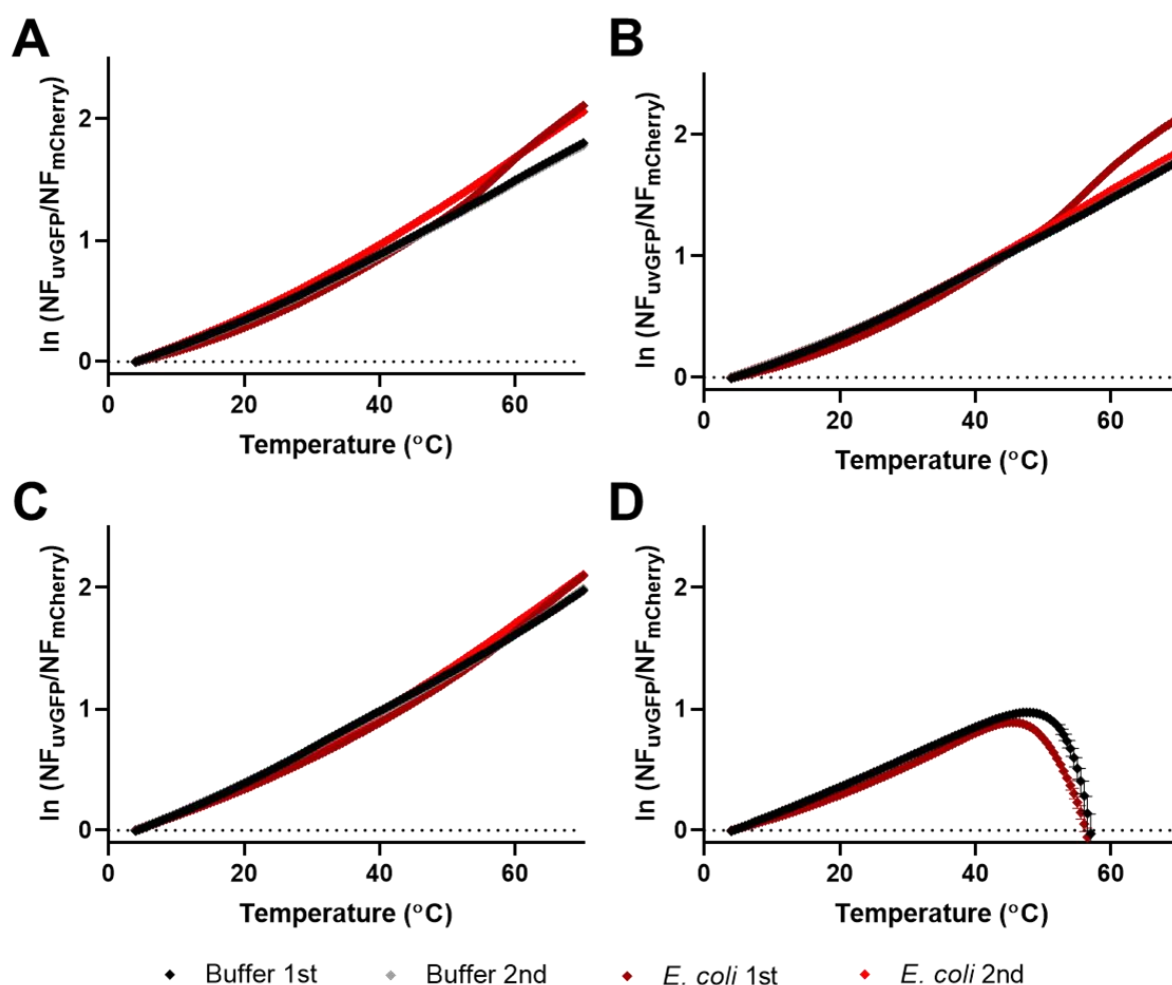

**Figure S6.** Performance of DFPTB in *E. coli* compared to purified DFPTB in various buffers. **(A)** PBS, pH 7.2. **(B)** Lysis buffer (50 mM phosphate (pH 7.8), 300 mM NaCl, 10% glycerol, 20 mM imidazole, 2 mM  $\beta$ -mercaptoethanol). **(C)** High salt lysis buffer (lysis buffer with 1.4 M NaCl). **(D)** Low pH (50 mM phosphate, pH 4.8). Buffer 1<sup>st</sup> and *E. coli* 1<sup>st</sup>: first melt curve run. Buffer 2<sup>nd</sup> and *E. coli* 2<sup>nd</sup>: second melt curve run. No second-round data are obtainable in low pH buffer as uvGFP is denatured in the first melt curve. Error bars indicate standard deviation.

## References

- Ye, F.; Wu, C.; Jin, Y.; Chan, Y.-H.; Zhang, X.; Chiu D.T. Ratiometric temperature sensing with semiconducting polymer dots. *J. Am. Chem. Soc.* **2011**, *133*, 8146–8149.
- Tang, J.-H.; Sun, Y.; Gong, Z.-L.; Li, Z.-Y.; Zhou, Z.; Wang, H.; Li, X.; Saha, M.L.; Zhong, Y.-W.; Stang, P.J. Temperature-Responsive Fluorescent Organoplatinum(II) Metallacycles. *J. Am. Chem. Soc.* **2018**, *140*, 7723–7729.
- Lv, Y.; Jin, Y.; Wu, H.; Liu, D.; Xiong, G.; Ju, G.; Chen, L.; Hu, Y. An all-optical ratiometric thermometer based on reverse thermal response from interplay among diverse emission center and traps with high-temperature sensitivity. *Ind. Eng. Chem. Res.* **2019**, *58*, 21242–21251.
- Cui, Y.; Song, R.; Yu, J.; Liu, M.; Wang, Z.; Wu, C.; Yang, Y.; Wang, Z.; Chen, B.; Qian, G. Dual-emitting MOF superset dye composite for ratiometric temperature sensing. *Adv. Mater.* **2015**, *27*, 1420–1425.
- Tang, S.; Wang, N.; Xu, X.; Feng, S. A ratiometric fluorescent thermometer based on amphiphilic alkynylpyrene derivatives. *N. J. Chem.* **2019**, *43*, 6461–6464.
- Lu, K.; Wazawa, T.; Sakamoto, J.; Vu, C.Q.; Nakano, M.; Kamei, Y.; Nagai, T. Intracellular Heat Transfer and Thermal Property Revealed by Kilohertz Temperature Imaging with a Genetically Encoded Nanothermometer. *Nano Lett.* **2022**, *22*, 5698–5707. <https://doi.org/10.1021/acs.nanolett.2c00608>.
- Nakano, M.; Arai, Y.; Kotera, I.; Okabe, K.; Kamei, Y.; Nagai, T. Genetically encoded ratiometric fluorescent thermometer with wide range and rapid response. *PLoS ONE* **2017**, *12*, e0172344. <https://doi.org/10.1371/journal.pone.0172344>.
- Shi, L.; Song, W.; Lian, C.; Chen, W.; Mei, J.; Su, J.; Liu, H.; Tian, H. Dual-emitting dihydrophenazines for highly sensitive and ratiometric thermometry over a wide temperature range. *Advanced Opt. Mater.* **2018**, *6*, 1800190.

- 
9. Zhang, Z.; Zhao, Z.; Wu, L.; Lu, S.; Ling, S.; Li, G.; Xu, L.; Ma, L.; Hou, Y.; Wang, X.; et al. Emissive Platinum(II) Cages with Reverse Fluorescence Resonance Energy Transfer for Multiple Sensing. *J. Am. Chem. Soc.* **2020**, *142*, 2592–2600. <https://doi.org/10.1021/jacs.9b12689>.
  10. Song, W.; Ye, W.; Shi, L.; Huang, J.; Zhang, Z.; Mei, J.; Su, J.; Tian, H. Smart molecular butterfly: An ultrasensitive and range-tunable ratiometric thermometer based on dihydrophenazines. *Mater. Horiz.* **2020**, *7*, 615–623.
